# Supplementary material for: Expanding the Fossil Record of Soldier Fly Larvae—An Important Component of the Cretaceous Amber Forest
Source: MDPI journal article supplement (doi:10.3390/d15020247), 2023-02-09
Supplement: s1 [file s1]

### Additional references for table in File S1 not referred to in main text

- Beuk, P. 1990. Het voorkomen van *Zabrachia tenella* in Nederland (Diptera: Stratiomyidae). Entomologischen Berichten 50, 101–106.
- Bucánková, A., Kovac, D., Rozkošný, R. 2009. The Larva and puparium of the oriental *Pegadomyia pruinosa* Kertész, with a world list of the described Pachygastrinae larvae (Diptera: Stratiomyidae). Raffles Bulletin of Zoology 57(2), 239–249.
- Dušek, J., Rozkošný, R. 1967. Revision mitteleuropäischer Arten der Familie Stratiomyidae (Diptera) mit besonderer Berücksichtigung der Fauna der ČSSR IV. Acta Entomologica Bohemoslovaca 64(2), 140–165.
- Godoi, F.S.P., Pujol-Luz, J.R. 2018. Family Stratiomyidae. In: Thorp and Covich's Freshwater Invertebrates, pp. 771–777. Academic Press.
- Hennig, W. 1952. Die Larvenformen der Dipteren, Part III. Berlin: Akademie Verlag. 628 pp.
- James, M.T. 1981a. Stratiomyidae. In: McAlpine, J.F., Peterson, B.W., Shewell, G.E., Teskey, H.J., Vockeroth, J.R., Monty Wood, D., eds. Agriculture Canada Monograph 27. Hull: Canadian Government Publishing Centre 1, 496–511.
- James, M.T. 1981b. Xylomyidae. In: McAlpine, J.F., Peterson, B.W., Shewell, G.E., Teskey, H.J., Vockeroth, J.R., Monty Wood, D., eds. Agriculture Canada Monograph 27. Hull: Canadian Government Publishing Centre 1, 493–495.
- Lopes, A.L.D.F., Xerez, R.D., Silva, R.R.D., Pujol-Luz, J.R. 2006. Descrição dos pupários de *Manotes crassimanus* James e *Pedinocera longicornis* Kertész (Diptera, Stratiomyidae, Pachygastrinae) da Ilha da Marambaia, Mangaratiba, Rio de Janeiro, Brasil. Revista Brasileira de Zoologia 23, 733–739.
- Marques, K.I.S., De Xerez, R. 2009. Description of the larva of *Popanomyia kerteszi* James & Woodley (Diptera: Stratiomyidae) and identification key to immature stages of Pachygastrinae. Neotropical Entomology 38(5), 643–648.
- McFadden, M.W. 1967. Soldier fly larvae in America North of Mexico. Proceedings of the United States National Museum 121, 1–72.
- Pujol-Luz, J.R., Pujol-Luz, C.V.A. 2014. Stratiomyidae. In: Roig-Juñent, S., Claps, L.E., Morrone, J.J., eds. Biodiversidad de Artrópodos Argentinos. San Miguel de Tucumán: Editorial INSUE UNT. 4, 396–406.
- Pujol-Luz, J.R., De Xerez, R., Viana, G.G. 2004. Descrição do pupário de *Raphiocera armata* (Wiedemann) (Diptera, Stratiomyidae) da Ilha da Marambaia, Rio de Janeiro, Brasil. Revista Brasileira de Zoologia 21(4), 995–999.
- Pujol-Luz, J.R., Lopes, W.R., Viana, G.G. 2016. Description of the puparium and redescription of the imagoes of *Chorophthalmyia brevicornis* Lindner (Diptera: Stratiomyidae) Zootaxa 4121(5), 583–588.

- Rapp, M. 2007. The immature stages of *Pantophthalmus planiventris* (Wiedemann, 1821)(Diptera: Pantophthalmidae) *Studia Dipterologica* 14(1), 27–36.
- Rapp, M. 2011. The immature stages of *Pantophthalmus bellardii* (Bigot) and late immature stages of *Pantophthalmus kerteszi* (Enderlein) (Diptera: Pantophthalmidae), with a review of host-tree relationships among the family). *Studia Dipterologica* 18(1/2), 91–104.
- Rozkošný, R. 1982. A biosystematic study of the European Stratiomyidae (Diptera) In: Spencer KA, ed. Volume 1. Introduction, Beridinae, Sarginae, Stratiomyinae. Series Entomologica. Hague-Boston-London: Springer Science & Business Media 21, 401 pp.
- Rozkošný, R. 1997. Diptera Stratiomyidae, soldier flies. *Aquatic Insects of North Europe—A Taxonomic Handbook* 2, 321–332.
- Rozkošný, R., Kovac, D. 1998. Descriptions of bamboo-inhabiting larvae and puparia of oriental soldier flies *Ptecticus brunettii* and *P. flavifemoratus* (Diptera: Stratiomyidae: Sarginae) with observations on their biology. *European Journal of Entomology* 95, 65–86
- Schremmer, F. 1985. Die polymetabole Larval-Entwicklung der Waffenfliegenart *Hermetia illucens*.—Ein Beitrag zur Metamorphose der Stratiomyidae. *Annalen des Naturhistorischen Museums in Wien. Serie B für Botanik und Zoologie* 88/89, 405–429.
- Stubbs, A.E., Drake, C.M. 2001. British soldierflies and their allies: an illustrated guide to their identification and ecology. British Entomological and Natural History Society, 528 pp.
- Teskey, H.J. 1976. Diptera larva associated with trees in North America. *Memoirs of the Entomological Society of Canada* 108(S100), 1–53
- Xerez, R.D., Garcia, E.R. 2008. Descrição do pupário de *Chlamydonotum nigreradiatum* Lindner (Diptera: Stratiomyidae) da Iha da Marambaia, Mangaratiba, RJ. *Neotropical Entomology* 37, 567–570.
