# Supplementary figures and images for: Expanding the Fossil Record of Soldier Fly Larvae—An Important Component of the Cretaceous Amber Forest
Source: MDPI journal article supplement (doi:10.3390/d15020247), 2023-02-09

-2S.D.

Mean

+2S.D.

PC1

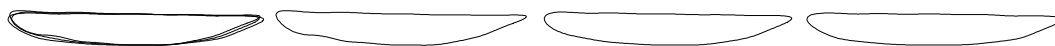

PC2

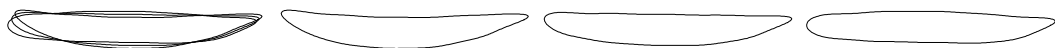

PC3

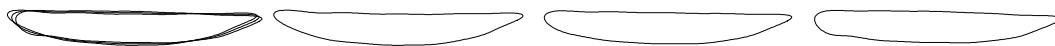

PC4

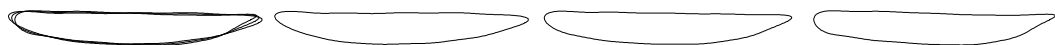

Supplement: s1 [file s1]
